# Supplementary material for: Benzoate acid-dependent formation of a series of interpenetrating metal–organic frameworks based on the cobalt∩1,4-bis(imidazolyl)benzene coordination substrate
Source: Royal Society of Chemistry journal article supplement (doi:10.1039/c0ce00865f), 2010-12-22
Supplement: c0ce00865f.pdf [file c0ce00865f.pdf]

## Supporting Information

### **Benzoate Acid-Dependent Formation of a Series of Interpenetrating Metal-Organic Frameworks Based on the Cobalt $\cap$ 1,4-Bis(imidazolyl)benzene Coordination Substrate**

Zuo-Xi Li,<sup>\*,†</sup> Xin Chu,<sup>†</sup> Guang-Hua Cui,<sup>‡</sup> Yu Liu,<sup>†</sup> Le Li,<sup>†</sup> and Gang-Lin Xue<sup>†</sup>

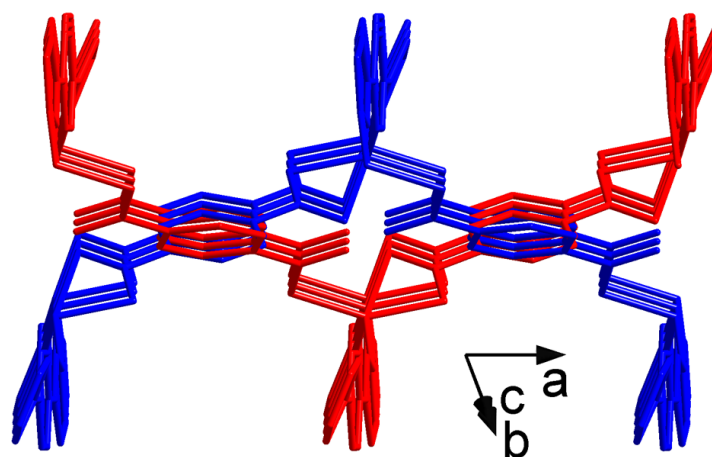

Figure S1 The (4,4) lattice pierced by a  $\text{bdc}^{2-}$  molecule from another equivalent layer.

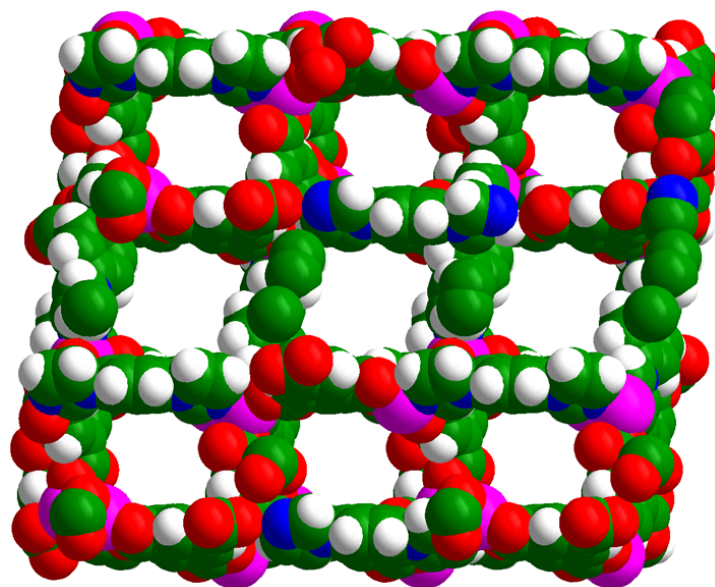

Figure S2 The tetragonal aperture within the isolated pcu framework in **2**.
